# Supplementary material for: Metal–organic framework-derived porous Mn1.8Fe1.2O4nanocubes with an interconnected channel structure as high-performance anodes for lithium ion batteries
Source: Royal Society of Chemistry journal article supplement (doi:10.1039/c4ta06150k), 2014-11-25
Supplement: c4ta06150k1.pdf [file c4ta06150k1.pdf]

# **Metal-Organic Framework-derived Porous Mn<sub>1.8</sub>Fe<sub>1.2</sub>O<sub>4</sub> Nanocubes with an interconnected channel structure as High-Performance Anodes for Lithium Ion Batteries**

Fangcai Zheng<sup>a</sup>, Dequan Zhu<sup>a#</sup>, Xiaohui Shi and Qianwang Chen<sup>a,b</sup>

<sup>a</sup>Hefei National Laboratory for Physical Science at Microscale, Department of Materials Science & Engineering & Collaborative Innovation Center of Suzhou Nano Science and Technology, University of Science and Technology of China, Hefei 230026, China.

<sup>b</sup>High Magnetic Field Laboratory, Hefei Institutes of Physical Science, Chinese Academy of Sciences, Hefei 230031, China.

E-mail: [cqw@ustc.edu.cn](mailto:cqw@ustc.edu.cn). Fax and Tel: +86 551 63603005.

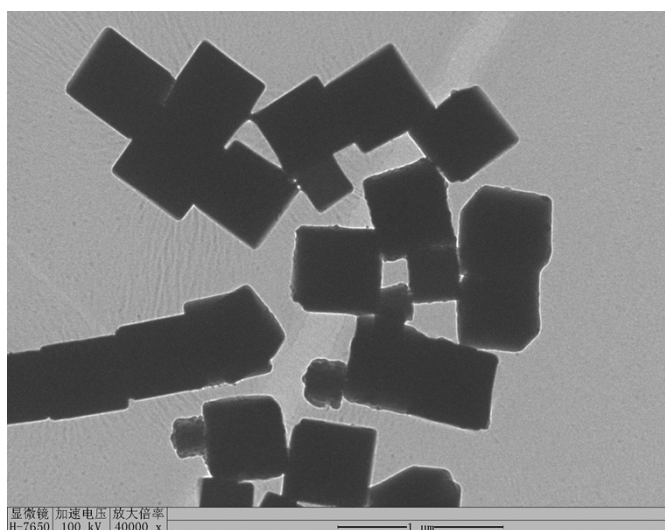

**Figure S1.** TEM image of Mn<sub>3</sub>[Fe(CN)<sub>6</sub>]<sub>2</sub>·nH<sub>2</sub>O nanocubes.

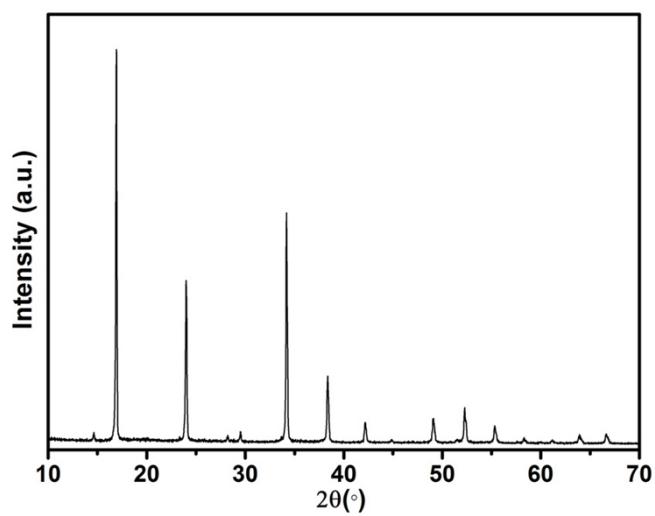

**Figure S2.** XRD pattern of Mn<sub>3</sub>[Fe(CN)<sub>6</sub>]<sub>2</sub>·nH<sub>2</sub>O nanocubes.

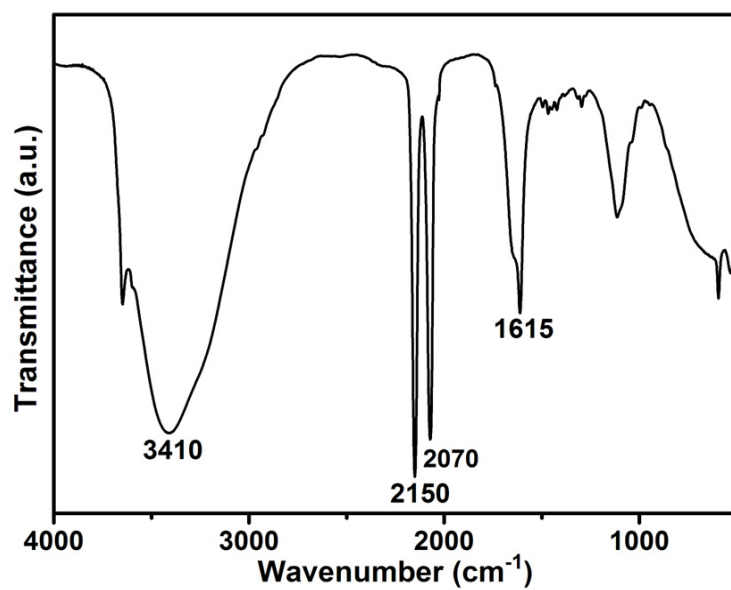

**Figure S3.** IR spectrum of  $\text{Mn}_3[\text{Fe}(\text{CN})_6]_2 \cdot n\text{H}_2\text{O}$  nanocubes.

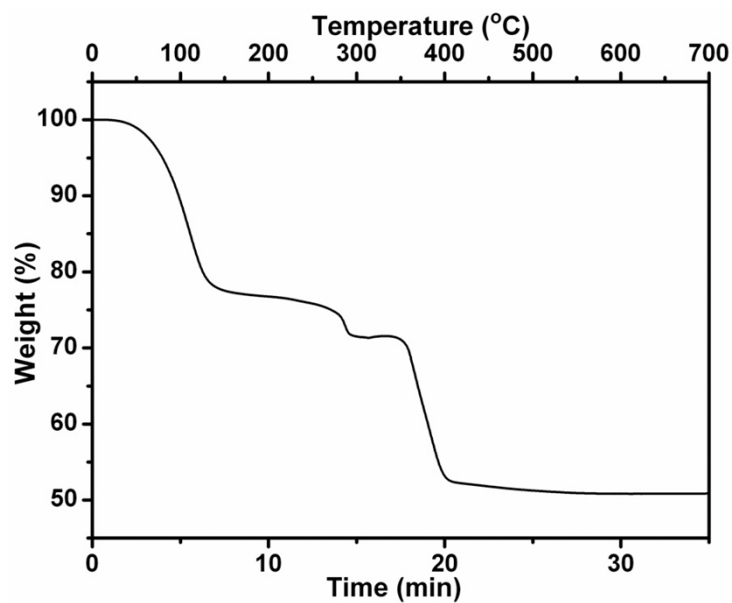

**Figure S4.** TGA curve of  $\text{Mn}_3[\text{Fe}(\text{CN})_6]_2 \cdot n\text{H}_2\text{O}$  nanocubes under a flow of the mixed carrier gas (80 vol% He and 20 vol% O<sub>2</sub>), with a heating rate of 20 °C min<sup>-1</sup>.

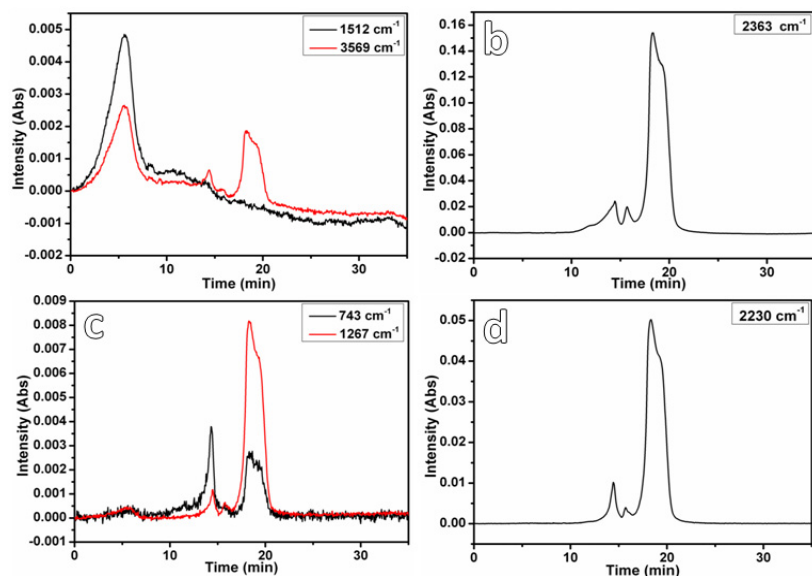

**Figure S5.** IR absorbance variation of (a) H<sub>2</sub>O, (b) CO<sub>2</sub>, (c) NO<sub>2</sub> and (CN)<sub>2</sub> as a function of time.

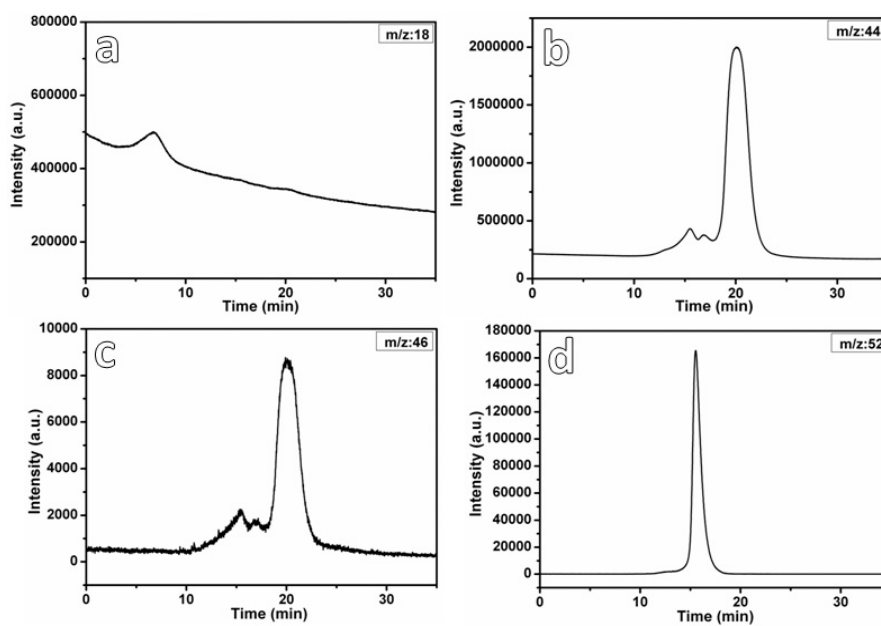

**Figure S6.** MS intensity variation of (a) H<sub>2</sub>O, (b) CO<sub>2</sub>, (c) NO<sub>2</sub> and (CN)<sub>2</sub> as a function of time.

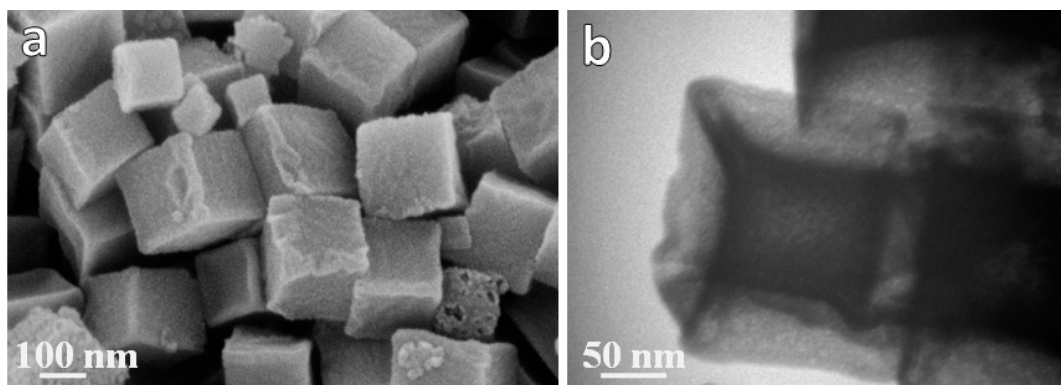

**Figure S7.** The high-magnification FESEM (a) and TEM (b) images of Mn<sub>1.8</sub>Fe<sub>1.2</sub>O<sub>4</sub> nanocubes.

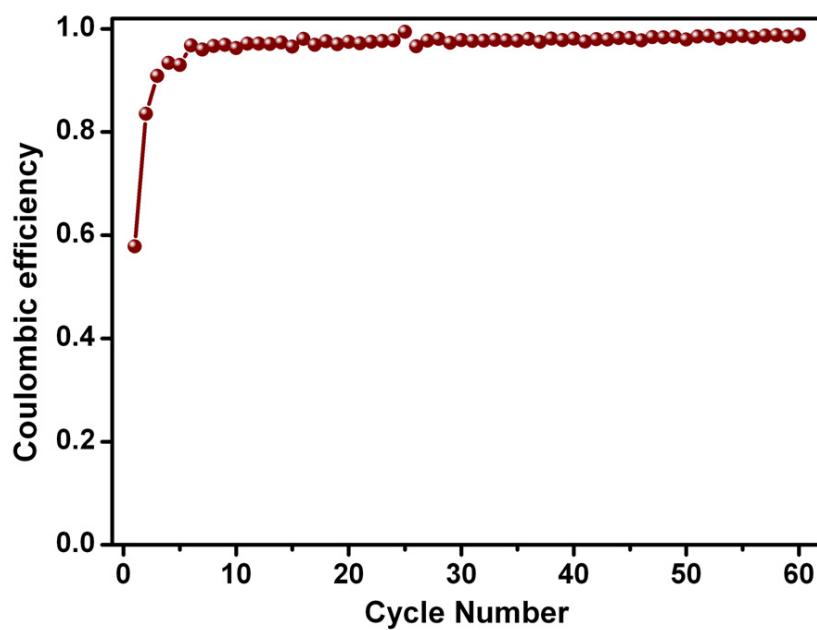

**Figure S8.** The coulombic efficiency of the Mn<sub>1.8</sub>Fe<sub>1.2</sub>O<sub>4</sub> nanocubes for lithium storage at a current density of 200 mA g<sup>-1</sup>.

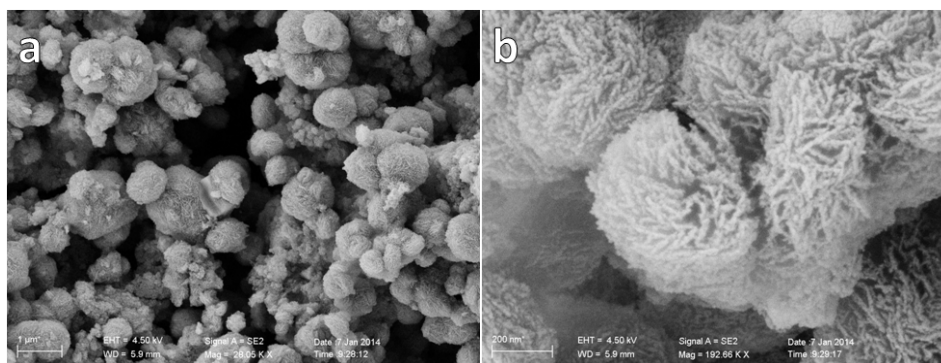

**Figure S9.** Morphological analysis of the electrode cycled for 20 cycles at a current density of  $200 \text{ mA g}^{-1}$ .

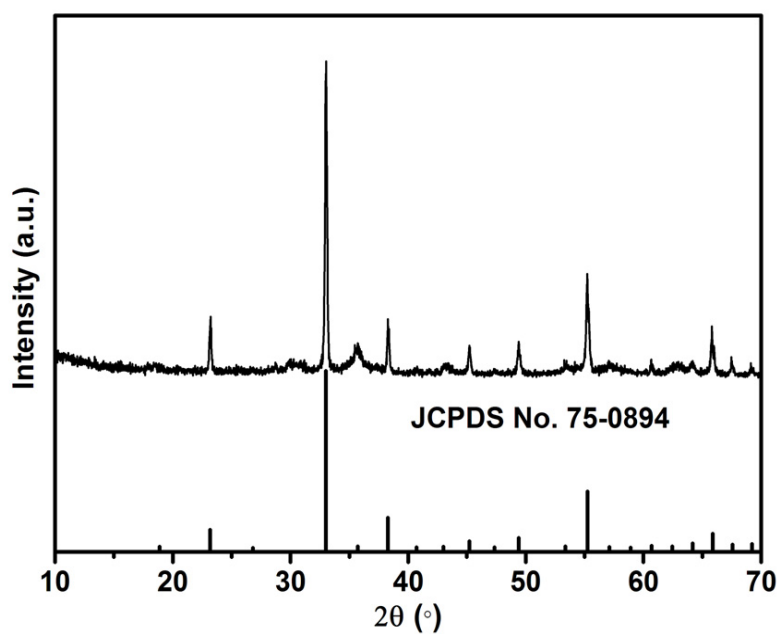

**Figure S10.** XRD pattern of as-prepared  $\text{Mn}_x\text{Fe}_{2-x}\text{O}_3$  obtained at  $600 \text{ }^\circ\text{C}$ .

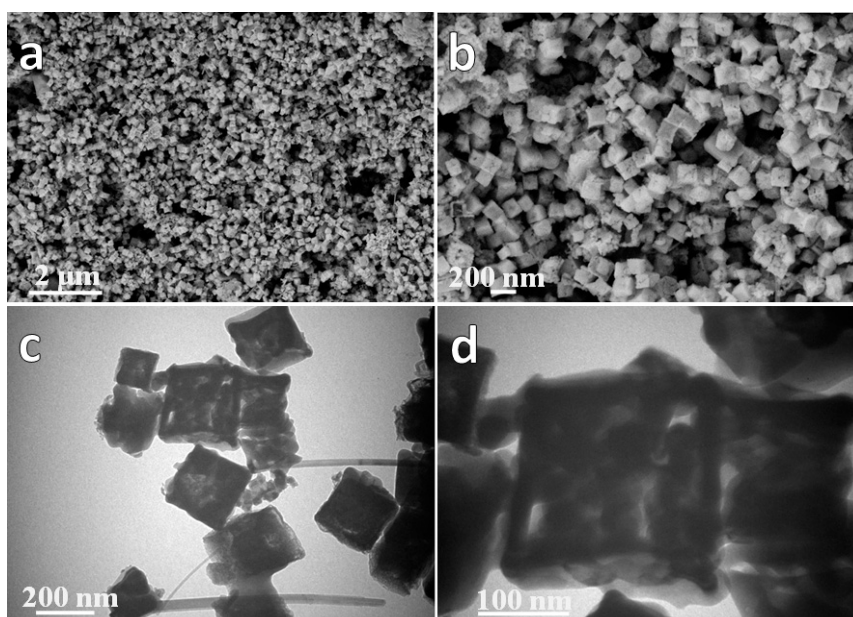

**Figure S11.** FESEM images of  $\text{Mn}_x\text{Fe}_{2-x}\text{O}_3$  sample at different magnification (a and b). TEM images of  $\text{Mn}_x\text{Fe}_{2-x}\text{O}_3$  sample at different magnification (c and d).

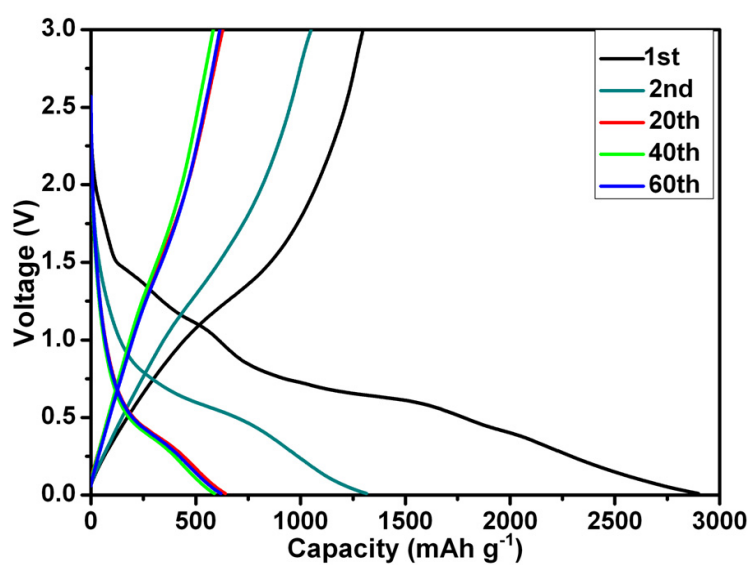

**Figure S12.** Discharge-charge curves of  $\text{Mn}_x\text{Fe}_{2-x}\text{O}_3$  sample (600 °C) at a current density of 200  $\text{mA g}^{-1}$ .

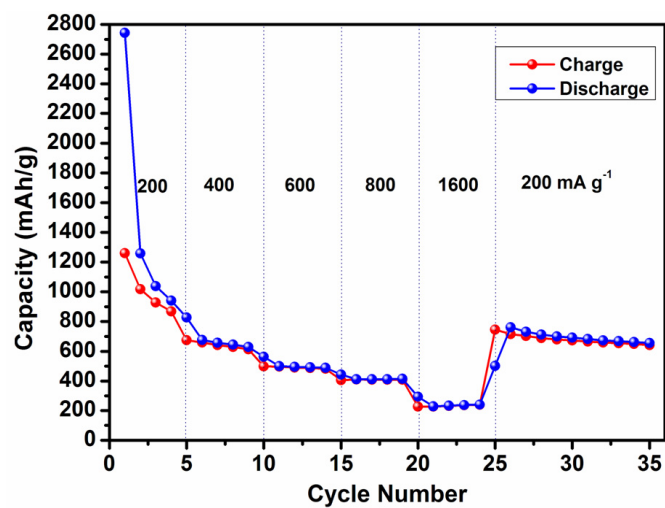

**Figure S13.** Rate capability test for the  $\text{Mn}_x\text{Fe}_{2-x}\text{O}_3$  nanocubes at various current densities (100-1600  $\text{mA g}^{-1}$ ).
